# Supplementary material for: Continuous electro-growth of a hierarchically structured hydrogel on a non-conductive surface
Source: Royal Society of Chemistry journal article supplement (doi:10.1039/d3ma01139a), 2024-01-01
Supplement: d3ma01139a1.pdf [file d3ma01139a1.pdf]

## Supporting Information

### Continuous electro-growth of hierarchically structured hydrogel on non-conductive surface

**Yuncheng Xu<sup>#</sup>, Jun Tong<sup>#</sup>, Jingxian Zhang, Yuting Li, Xiaowen Shi<sup>\*</sup>, Hongbing Deng, Yumin Du**

*School of Resource and Environmental Science, Hubei International Scientific and Technological Cooperation Base of Sustainable Resource and Energy, Hubei Engineering Center of Natural Polymers-Based Medical Materials, Hubei Biomass-Resource Chemistry and Environmental Biotechnology Key Laboratory, Wuhan University, Wuhan 430079, China*

<sup>#</sup> Yuncheng Xu and Jun Tong contributed equally to this work

<sup>\*</sup> Corresponding author; E-mail: [shixw@whu.edu.cn](mailto:shixw@whu.edu.cn);

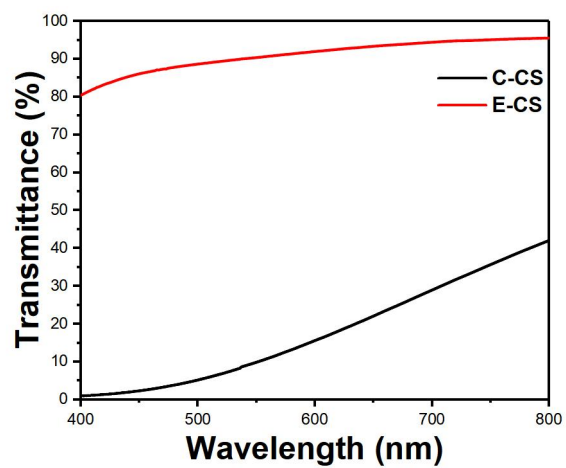

Figure S1: Transmittance of E-CS and C-CS (3 wt%)

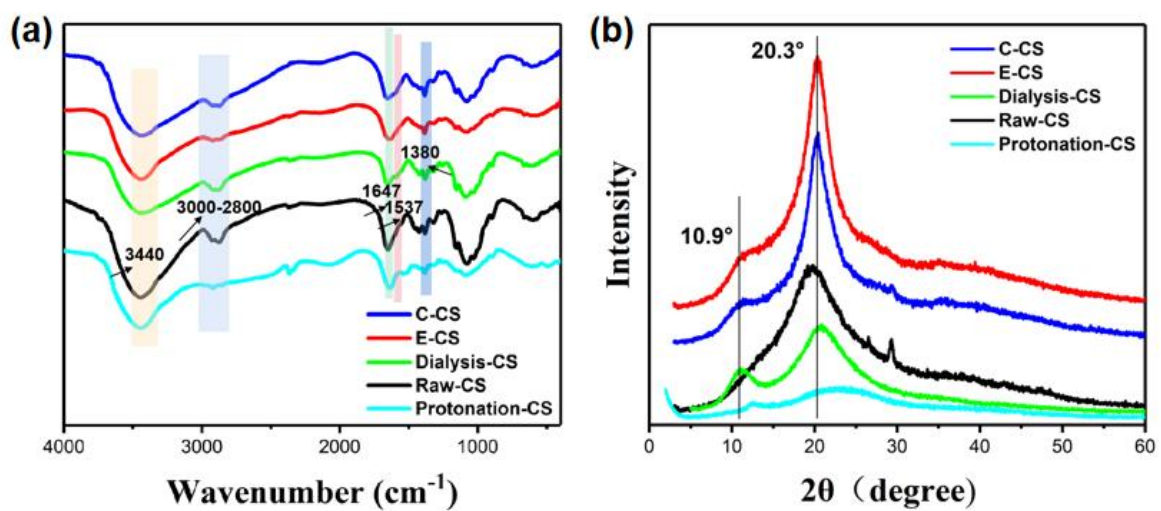

Figure S2: (a) FT-IR and (b) XRD spectra of chitosan prepared with different treatment methods.

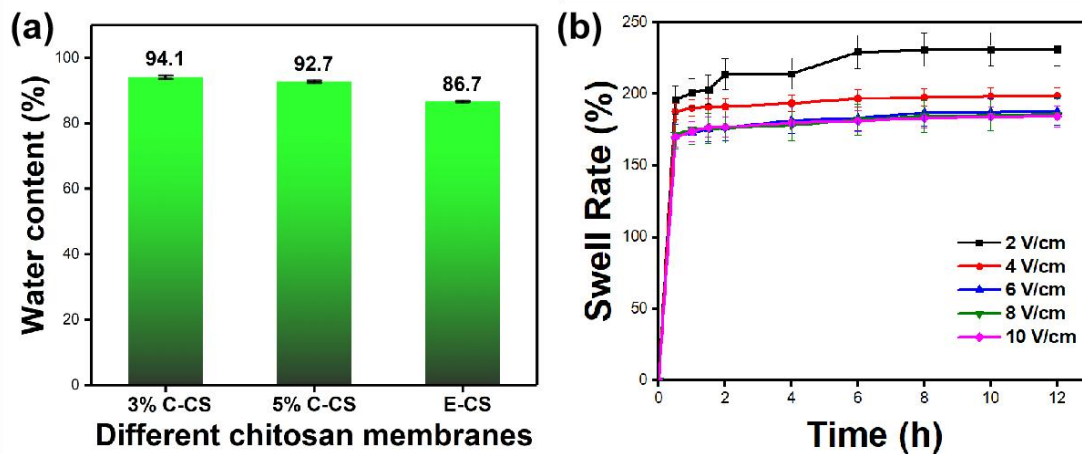

Figure S3: (a) The water content of different C-CS and the E-CS. (b) Swelling properties of E-CS films prepared at electric field intensity of 2, 4, 6, 8, 10 V/cm.

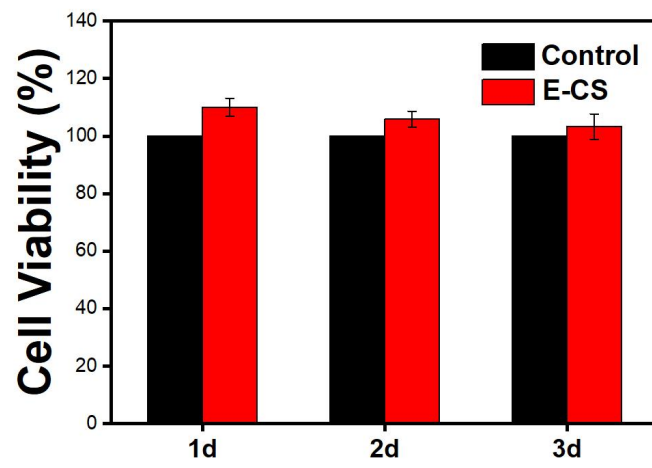

Figure S4: Cytotoxicity of E-CS films to L929.

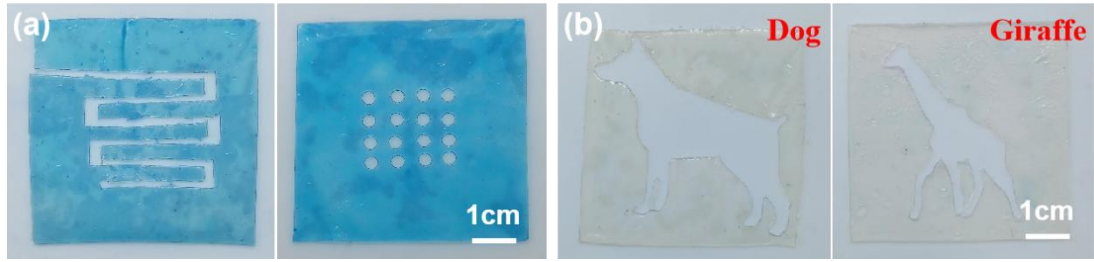

Figure S5: E-CS hydrogel films (dyed with methylene blue) with (a) flow channel and pore array. E-CS hydrogel films with patterns of (b) puppy and giraffe.
